# Supplementary material
Source: PubMed Central journal article supplement (PMC2593335)
Supplement: supp_82_24_12094__2.pdf [file supp_82_24_12094__2.pdf]

**a**

|                 | IC80 titer |     |    |    |    |    |      |      |    |       |    |    |    |    |    | Breadth score |      | Potency score |       |       |
|-----------------|------------|-----|----|----|----|----|------|------|----|-------|----|----|----|----|----|---------------|------|---------------|-------|-------|
|                 | A1         | A2  | A3 | A4 | A5 | A6 | A/D1 | A/D2 | D1 | D2    | D3 | C1 | C2 | C3 | B5 | B15           | Mean | Median        | score | score |
| QA013 264 dpi   | 61         |     |    |    |    |    |      |      |    |       |    |    |    |    |    |               | 27   | 25            | 4     | 21.0  |
| QC370 302 dpi   | 58         |     |    |    |    |    |      |      |    |       |    |    |    |    |    |               | 27   | 25            | 1     | 16.0  |
| QA465 227 dpi   |            |     |    |    |    | 59 |      |      |    | *auto |    |    |    |    |    |               | 27   | 25            | 9     | 31.1  |
| QD435 299 dpi   |            |     |    |    |    |    |      |      |    |       |    |    |    |    |    |               | 25   | 25            | 0     | 15.3  |
| QB008 303 dpi   |            |     |    |    |    |    |      |      |    |       |    |    |    |    |    |               | 25   | 25            | 0     | 15.7  |
| QC406 379 dpi   | 100        |     |    |    |    |    |      |      |    |       |    |    |    |    |    |               | 30   | 25            | 2     | 17.1  |
| QB099 283 dpi   | 54         |     |    |    |    |    |      |      |    |       |    |    |    |    |    |               | 27   | 25            | 0     | 16.0  |
| QD370 278 dpi   |            |     |    |    |    |    |      |      |    |       |    |    |    |    |    |               | 25   | 25            | 0     | 15.3  |
| QA413 275 dpi   |            |     |    |    |    |    |      |      |    |       |    |    |    |    |    |               | 25   | 25            | 0     | 15.7  |
| QC890 306 dpi   |            |     |    |    |    |    |      |      |    |       |    |    |    |    |    |               | 25   | 25            | 1     | 16.7  |
| QA509 368 dpi   | 50         |     |    |    |    | 53 |      |      |    |       |    |    |    |    |    |               | 28   | 25            | 3     | 20.9  |
| QC036 385 dpi   | 78         |     |    |    |    |    |      |      |    |       |    |    |    |    |    |               | 28   | 25            | 2     | 18.8  |
| QB045 695 dpi   |            |     |    |    |    |    |      |      |    |       |    |    |    |    |    |               | 25   | 25            | 0     | 15.3  |
| QA281 656 dpi   |            |     |    |    |    |    |      |      |    |       |    |    |    |    |    |               | 25   | 25            | 1     | 16.9  |
| QA692 707 dpi   | 227        | 140 | 85 |    |    |    |      | 62   |    |       |    |    |    | 96 |    |               | 55   | 25            | 7     | 45.0  |
| QB247 667 dpi   |            |     |    |    |    |    |      |      |    |       |    |    |    |    |    |               | 25   | 25            | 0     | 15.6  |
| QB726 468 dpi   | 72         | 59  |    |    |    |    |      |      |    |       |    |    |    |    |    |               | 30   | 25            | 2     | 18.5  |
| QC413 416.5 dpi | 123        |     |    |    |    |    |      |      |    |       |    |    |    |    |    |               | 31   | 25            | 3     | 20.6  |
| QA874 463 dpi   | 94         | 112 |    |    |    |    |      |      |    |       |    |    |    |    |    |               | 35   | 25            | 2     | 19.5  |
| QB670 321 dpi   | 85         |     |    |    |    |    |      |      |    |       |    |    |    |    |    |               | 29   | 25            | 12    | 33.0  |
| QD022 439 dpi   |            |     |    |    |    |    |      |      |    |       |    |    |    |    |    |               | 25   | 25            | 0     | 15.3  |
| QA779 481 dpi   | 83         | 85  |    |    |    |    |      |      |    |       |    |    |    |    |    |               | 32   | 25            | 2     | 24.2  |
| QA028 451 dpi   | 87         |     |    |    |    |    |      |      |    |       |    |    |    |    |    |               | 29   | 25            | 2     | 18.1  |
| QA538 410 dpi   |            |     |    |    |    |    |      |      |    |       |    |    |    |    |    |               | 25   | 25            | 0     | 15.3  |

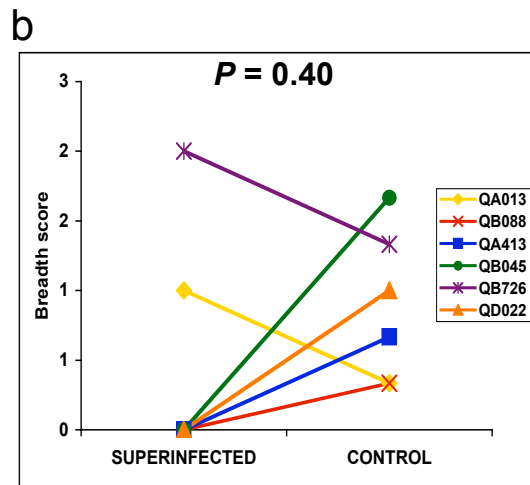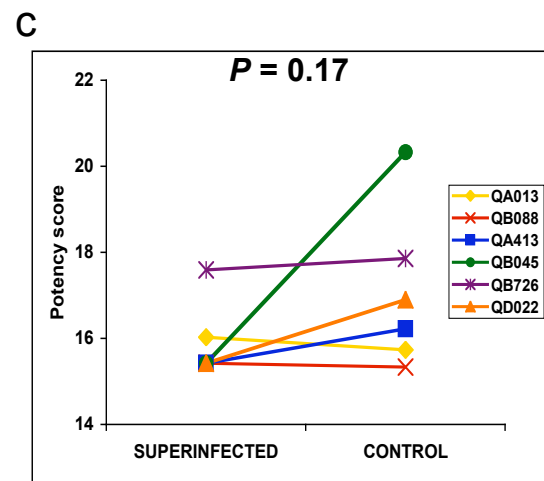

**Supplemental Figure 2. NAb responses by IC80 at ~1 year post-infection.** (a) IC80 values for plasma/virus combinations are presented as described in the legend to Figure 2a. (b) Comparison of breadth scores calculated using IC80 values between superinfection cases and matched controls prior to superinfection, as for Figure 2b. (c) Comparison of potency scores calculated using IC80 values between superinfection cases and matched controls prior to superinfection, as for Figure 2c.
