# Supplementary material
Source: PubMed Central journal article supplement (PMC2593335)
Supplement: supp_82_24_12094__4.pdf [file supp_82_24_12094__4.pdf]

**a**

|                 | IC80 titer |     |    |    |    |    |      |      |       |    |    |     |     |       |    | mean |    | median |   | breadth score | potency score |
|-----------------|------------|-----|----|----|----|----|------|------|-------|----|----|-----|-----|-------|----|------|----|--------|---|---------------|---------------|
|                 | A1         | A2  | A3 | A4 | A5 | A6 | A/D1 | A/D2 | D1    | D2 | D3 | C1  | C2  | C3    | B5 | B15  |    |        |   |               |               |
| QA013 264 dpi   | 61         |     |    |    |    |    |      |      |       |    |    |     |     |       |    |      | 27 | 25     | 1 | 16.0          |               |
| QC370 302 dpi   | 58         |     |    |    |    |    |      |      |       |    |    |     |     |       |    |      | 27 | 25     | 0 | 16.0          |               |
| QA467 227 dpi   |            |     |    |    |    | 59 |      |      | *auto |    |    |     |     |       |    |      | 27 | 25     | 1 | 15.8          |               |
| QD435 299 dpi   |            |     |    |    |    |    |      |      |       |    |    |     |     |       |    |      | 25 | 25     | 0 | 15.4          |               |
| QB008 303.5 dpi |            |     |    |    |    |    |      |      |       |    |    |     |     |       |    |      | 25 | 25     | 0 | 15.4          |               |
| QC406 379 dpi   | 100        |     |    |    |    |    |      |      |       |    |    |     |     | *auto |    |      | 30 | 25     | 1 | 14.7          |               |
| QB099 283 dpi   | 54         |     |    |    |    |    |      |      |       |    |    |     |     |       |    |      | 27 | 25     | 0 | 15.9          |               |
| QD370 278.5 dpi |            |     |    |    |    |    |      |      |       |    |    |     |     |       |    |      | 25 | 25     | 0 | 15.4          |               |
| QA413 714 dpi   | 142        | 63  | 57 |    |    |    |      |      |       |    |    |     |     |       |    |      | 37 | 25     | 3 | 20.2          |               |
| QC890 675 dpi   | 74         | 92  |    |    |    |    |      |      |       |    |    |     |     |       |    |      | 32 | 25     | 2 | 18.9          |               |
| QA509 753 dpi   | 70         |     |    |    |    |    |      |      |       |    |    |     |     |       |    |      | 28 | 25     | 1 | 16.2          |               |
| QC036 780 dpi   | 110        |     |    |    |    |    |      |      |       |    |    |     |     |       |    |      | 30 | 25     | 1 | 16.8          |               |
| QB045 1680 dpi  |            | 85  |    |    |    |    |      |      |       |    |    |     |     |       | 25 |      | 29 | 25     | 1 | 17.8          |               |
| QA281 1680 dpi  |            |     |    |    |    |    |      |      |       |    |    |     |     |       |    |      | 25 | 25     | 0 | 15.4          |               |
| QA692 1740 dpi  | 201        |     |    |    |    |    |      |      |       |    |    | 238 | 60  |       |    |      | 51 | 25     | 3 | 28.3          |               |
| QB247 1667 dpi  | 160        | 146 |    |    |    |    |      | 61   |       |    |    | 60  | 137 |       |    |      | 52 | 25     | 5 | 29.9          |               |
| QB726 1031 dpi  | 284        | 184 | 52 |    |    |    |      |      |       |    |    |     |     |       |    |      | 53 | 25     | 3 | 27.2          |               |
| QC413 969.5 dpi | 187        | 117 | 59 | 51 |    |    |      |      |       |    |    |     |     | 64    |    |      | 47 | 25     | 5 | 25.8          |               |
| QA847 1043 dpi  |            |     |    |    |    |    |      |      |       |    |    |     |     |       |    |      | 25 | 25     | 0 | 15.4          |               |
| QB670 1005 dpi  |            |     |    |    |    |    |      |      |       |    |    |     |     |       |    |      | 25 | 25     | 0 | 15.4          |               |
| QD022 1832 dpi  | 66         |     |    |    |    |    |      |      |       |    |    |     |     |       |    |      | 28 | 25     | 1 | 16.1          |               |
| QA779 1888 dpi  |            |     |    |    |    |    |      |      |       |    |    |     |     |       |    |      | 25 | 25     | 0 | 15.4          |               |
| QA028 1767 dpi  | 464        | 455 | 61 |    |    | 81 |      |      |       |    |    |     |     |       |    |      | 85 | 25     | 4 | 43.7          |               |
| QA538 1781 dpi  |            |     |    |    |    |    |      |      |       |    |    |     |     |       |    |      | 25 | 25     | 0 | 15.4          |               |

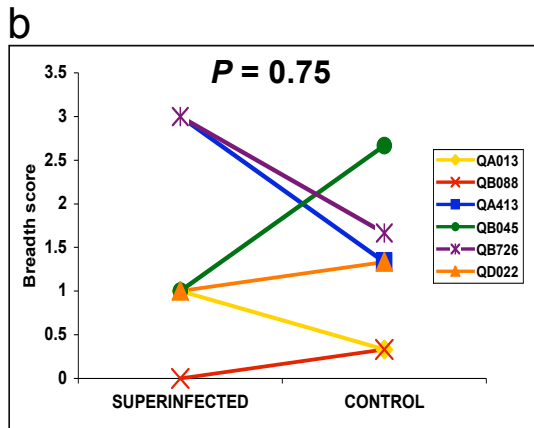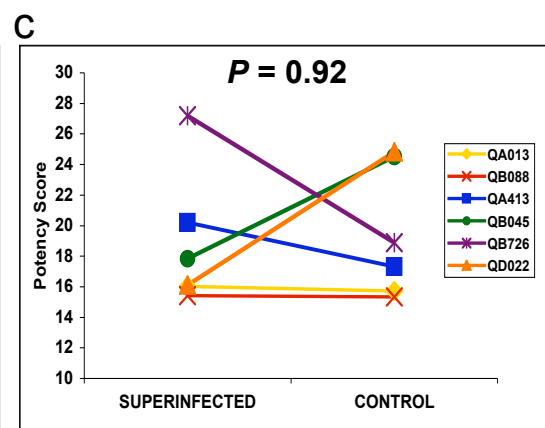

**Supplemental Figure 4. NAb responses by IC80 prior to superinfection.**  
 (a) IC80 values for plasma/virus combinations are presented as described in the legend to Figure 2a. (b) Comparison of breadth scores calculated using IC80 values between superinfection cases and matched controls prior to superinfection, as for Figure 2b. (c) Comparison of potency scores calculated using IC80 values between superinfection cases and matched controls prior to superinfection, as for Figure 2c.
